# Supplementary material
Source: publisher site journal article supplement (https://www.dovepress.com/get_supplementary_file.php?f=496733.docx)
Supplement: Supplementary file 1 [file get_supplementary_file.php]

Supplementary Table S1: Summary of demographics, clinical data, and treatment characteristics of deceased patients post-EVT.

| Variables |  | Total (n=721) |
| --- | --- | --- |
| Age, mean years(SD) |  | 72.36(11.71) |
| Gender, Male |  | 353(49%) |
| Time from onset to death, days(SD) |  | 5.62(5.87) |
| pre-mRS≥2 |  | 29(4%) |
| Admission NIHSS score, mean(SD) |  | 19.27(7.50) |
| Admission ASPECTS, mean(SD) |  | 7.1(1.96) |
| SBP, mean mmHg(SD) |  | 146.70 (27.34) |
| DBP, mean mmHg(SD) |  | 84.91(17.32) |
| FPG, mean mmol/L(SD) |  | 9.529(4.29) |
| Neutrophils, mean 109/L(SD) |  | 10.51(13.23) |
| Lymphocyte, mean 109/L(SD) |  | 1.42(1.38) |
| sCr, mean μmol/L (SD) |  | 91.13(69.86) |
| LDL, mean mmol/L (SD) |  | 2.79 (6.48) |
| Smoking, n (%) |  | 230(31.9%) |
| Alcohol, n (%) |  | 194(26.9%) |
| Hypertension, n (%) |  | 409(56.7%) |
| DM, n (%) |  | 186(25.8%) |
| Previous ischemic stroke, n (%) |  | 102(14.1%) |
| Previous hemorrhagic stroke |  | 15(2.1%) |
| Atrial fibrillation, n (%) |  | 438(60.7%) |
| TOAST classification, n (%) | LAA | 271(37.6%) |
|  | Cardioembolism | 431(59.8%) |
|  | Other etiology | 14(1.9%) |
|  | Undetermined etiology | 5(0.7%) |
| Wake-up stroke |  | 121(17%) |
| Onset to admission, min (SD) |  | 260.36(496.08) |
| Admission to puncture, min (SD) |  | 126.08 (178.75) |
| Puncture to reperfusion,min (SD) |  | 100.05(62.55) |
| IVT |  | 205(28.4%) |
| Occlusion site, n (%) | LVO | 524(88.2%) |
|  | MeVO | 70(11.8%) |
| Tandem occlusion |  | 97(13.5%) |
| ASITN/SIR | poor | 700(97.2%) |
|  | good | 20(2.8%) |
| Time from onset to puncture | <6h | 511(70.9%) |
|  | ≥6h | 210(29.1%) |
| General anesthesia, n (%) |  | 366(50.8%) |
| *Stenting, n (%) |  | 86(11.9%) |
| Operative time | daytime | 337(46.7%) |
|  | nighttime | 384(53.3%) |
| Successful revascularization, n (%) |  | 553(76.7%) |
| Procedural complications, n (%) |  | 52(7.2%) |
| Interventionalist’s experience, mean years (SD) |  | 4.16(2.03) |
| Aspiration,n (SD) |  | 1.40(1.33) |
| Stent retrievers,n (SD) |  | 1.45 (1.28) |
| ICH, n (%) |  | 254(35.2%) |
| sICH, n (%) |  | 220(30.5%) |
| Brain herniation |  | 510(70.7%) |

*= extracranial stenting and/or intracranial stenting; NIHSS=National Institute of Health Stroke Scale; ASPECTS=Alberta Stroke Program Early CT Score; SBP=systolic blood pressure; DBP=diastolic blood pressure; FPG=fasting plasma glucose; sCr=serum creatinine; LDL=low density lipoprotein; DM=diabetes mellitus; LAA=Large artery atherosclerosis. IVT=intravenous thrombolysis; LVO=large-vessel occlusions; MeVO=medium-vessel occlusions; ASITN/SIR=American Society of Interventional and Therapeutic Neuroradiology/Society of Interventional Radiology; ICH=intracranial hemorrhage; sICH=symptomatic intracranial hemorrhage.

Supplementary Table S2: Analysis of the characteristics of causes of death by anterior and posterior strokes

| | causes of death | | --- | |  | | Anterior circulation stroke | | Posterior circulation stroke | |
| --- | --- | --- | --- | --- | --- | --- |
| frequency | percentage | frequency | percentage |
| malignant cerebral edema | 311 | 52.40% | 54 | 42.50% |
| pneumonia | 120 | 20.20% | 60 | 47.20% |
| symptomatic intracranial hemorrhage | 88 | 14.80% | 6 | 4.70% |
| cardiogenic death | 35 | 5.90% | 2 | 1.60% |
| withdrawal of life-sustaining treatment | 22 | 3.70% | 4 | 3.10% |
| sepsis | 8 | 1.30% | - | - |
| tumor | 5 | 0.80% | - | - |
| pulmonary embolism | 4 | 0.70% | 1 | 0.80% |
| recurrent ischemic stroke | 1 | 0.20% | - | - |
| total | 594 | 100% | 127 | 100% |

Supplementary Table S3: Analysis of the characteristics of causes of death by the time of death

| causes of death | <=3days | | <=1week | | >1week | |
| --- | --- | --- | --- | --- | --- | --- |
| frequency | Percentage | frequency | percentage | frequency | percentage |
| malignant cerebral edema | 258 | 70.1% | 90 | 52.9% | 17 | 9.3% |
| pneumonia | 26 | 7.1% | 45 | 26.5% | 109 | 59.6% |
| symptomatic intracranial hemorrhage | 65 | 17.7% | 21 | 12.4% | 8 | 4.4% |
| cardiogenic death | 9 | 2.4% | 7 | 4.1% | 21 | 11.5% |
| withdrawal of life-sustaining treatment | 8 | 2.2% | 2 | 1.2% | 16 | 8.7% |
| sepsis | - | - | 1 | 0.6% | 7 | 3.8% |
| tumor | - | - | 1 | 0.6% | 4 | 2.2% |
| pulmonary embolism | 2 | 0.5% | 2 | 1.2% | 1 | 0.5% |
| recurrent ischemic stroke | - | - | 1 | 0.6% | - | - |
| total | 368 | 100% | 170 | 100% | 183 | 100% |

Supplementary Table S4: Analysis of the characteristics of causes of death by age.

| | causes of death | | --- | |  | | <60 year-old | | 60-80 year-old | | >80 year-old | |
| --- | --- | --- | --- | --- | --- | --- | --- | --- |
| frequency | percentage | frequency | percentage | frequency | percentage |
| malignant cerebral edema | 68 | 57.60% | 199 | 52.20% | 98 | 44.10% |
| pneumonia | 24 | 20.30% | 95 | 24.90% | 61 | 27.50% |
| symptomatic intracranial hemorrhage | 12 | 10.20% | 50 | 13.10% | 32 | 14.40% |
| cardiogenic death | 6 | 5.10% | 15 | 3.90% | 16 | 7.20% |
| withdrawal of life-sustaining treatment | 3 | 2.50% | 14 | 3.70% | 9 | 4.10% |
| sepsis | 1 | 0.80% | 4 | 1% | 3 | 1.40% |
| tumor | 3 | 2.50% | 2 | 0.50% | - | - |
| pulmonary embolism | 1 | 0.80% | 1 | 0.30% | 3 | 1.40% |
| recurrent ischemic stroke | - | - | 1 | 0.30% | - | - |
| total | 118 | 100% | 381 | 100% | 222 | 100% |
